# Supplementary material for: Multilevel optical data storage in a Eu2+/Ho3+ doped Ba2SiO4 phosphor with linear mapping between ultraviolet excitation and a thermoluminescence/photostimulated luminescence response
Source: Royal Society of Chemistry journal article supplement (doi:10.1039/d1tc05254c), 2021-12-06
Supplement: d1tc05254c1.pdf [file d1tc05254c1.pdf]

## Supplementary Information

### Multilevel Optical Data Storage in $\text{Eu}^{2+}/\text{Ho}^{3+}$ doped $\text{Ba}_2\text{SiO}_4$ Phosphor with Linear Mapping between Ultraviolet Excitation and Thermoluminescence/Photostimulated Luminescence Response

*Mingliang Pan,<sup>‡</sup> Yi Zhong,<sup>‡</sup> Hui Lin,<sup>‡</sup> Hongran Bao, Lulu Zheng, Ruijin Hong, Bo Dai,<sup>\*</sup> Dechao Yu,<sup>\*</sup> Dawei Zhang,<sup>\*</sup> and Songlin Zhuang*

Engineering Research Center of Optical Instrument and System, the Ministry of Education, Shanghai Key Laboratory of Modern Optical System, University of Shanghai for Science and Technology, Shanghai, 200093, China.

E-mail: daibo@usst.edu.cn, d.yu@usst.edu.cn, dwzhang@usst.edu.cn

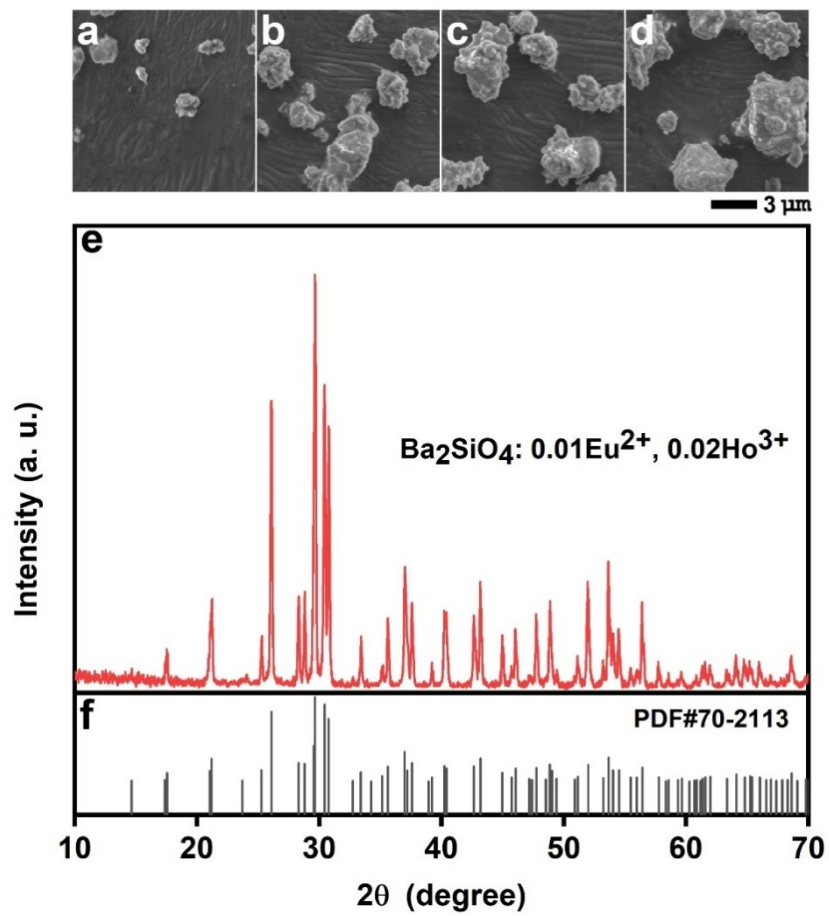

**Figure S1.** a)-d) SEM images of the Ba<sub>2</sub>SiO<sub>4</sub>:0.01Eu<sup>2+</sup>,0.02Ho<sup>3+</sup>phosphor powders. e) XRD pattern of the phosphor powder. f) The standard XRD pattern of the Ba<sub>2</sub>SiO<sub>4</sub>.

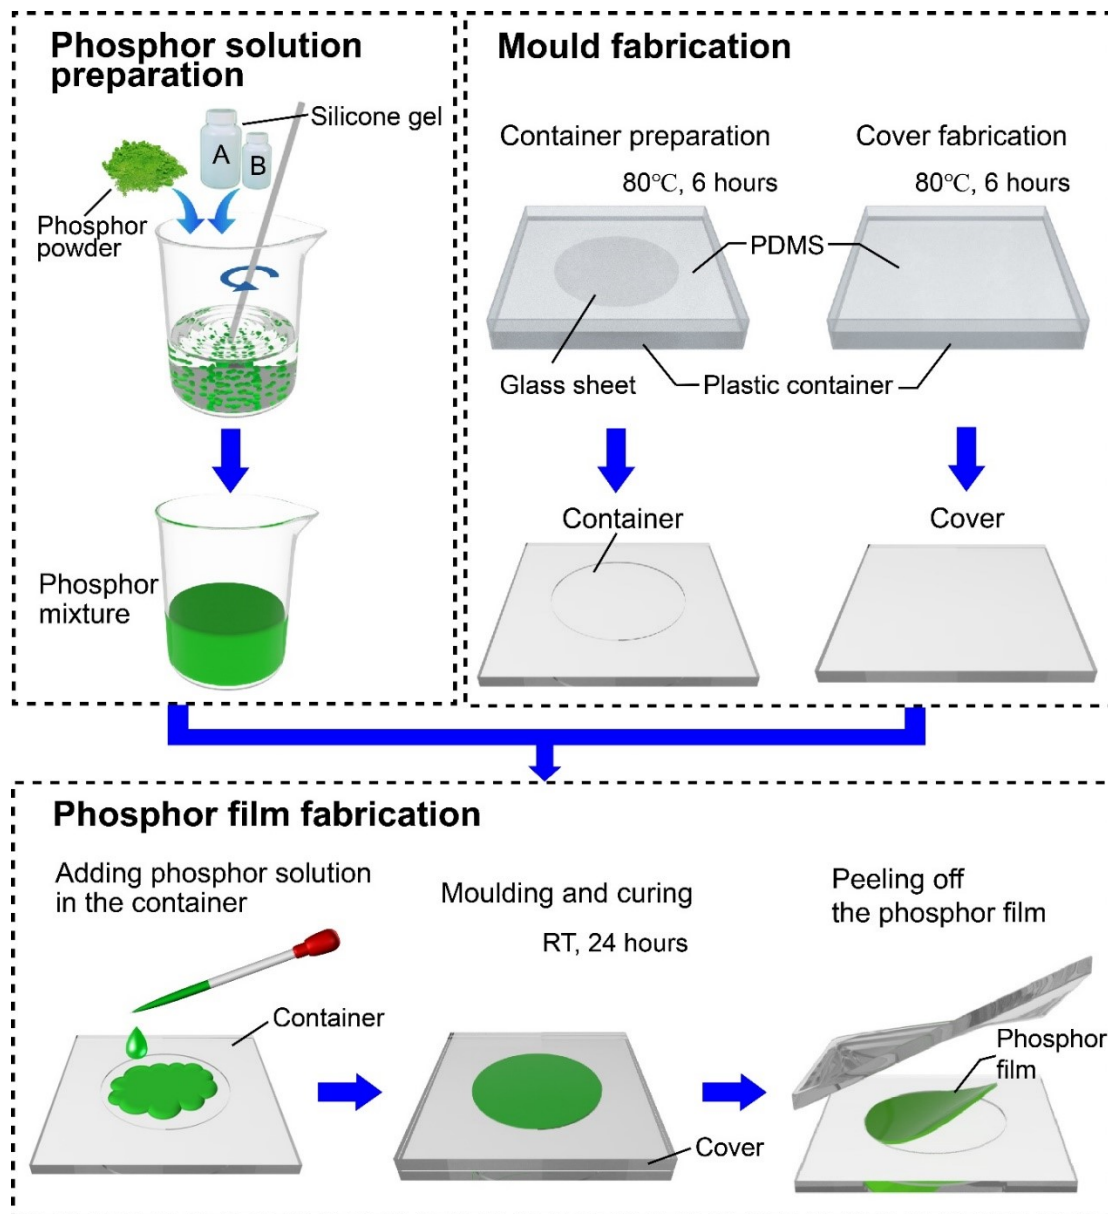

**Figure S2.** Fabrication of the phosphor film. Phosphor solution was prepared by mixing phosphor powder in the silicone gel. Meanwhile, a container was prepared for molding the films. Phosphor films can be casted by molding the phosphor-silicone gel in the container.

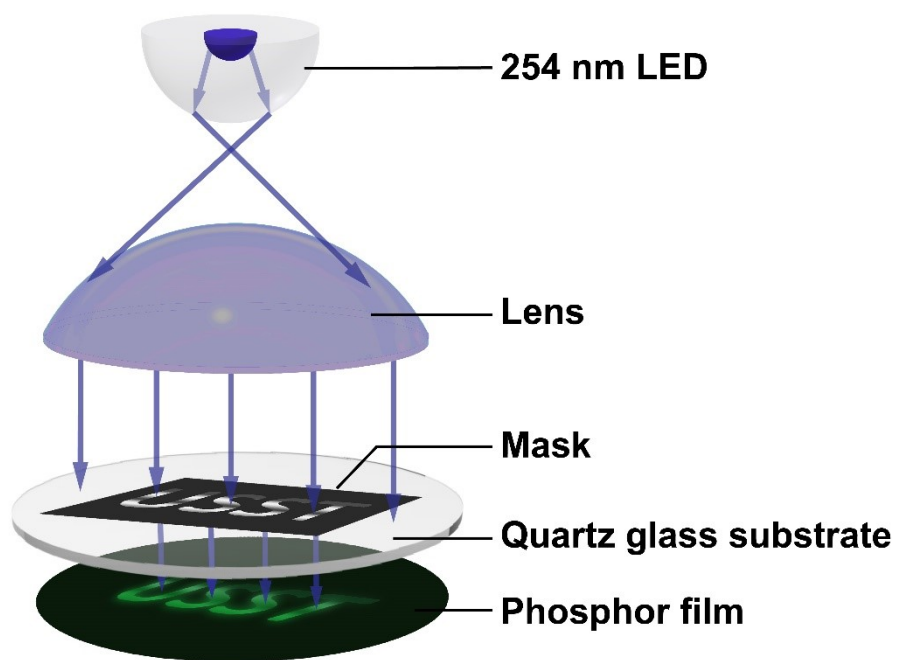

**Figure S3.** The experimental setup for charging the phosphor film via a gray-scale mask.

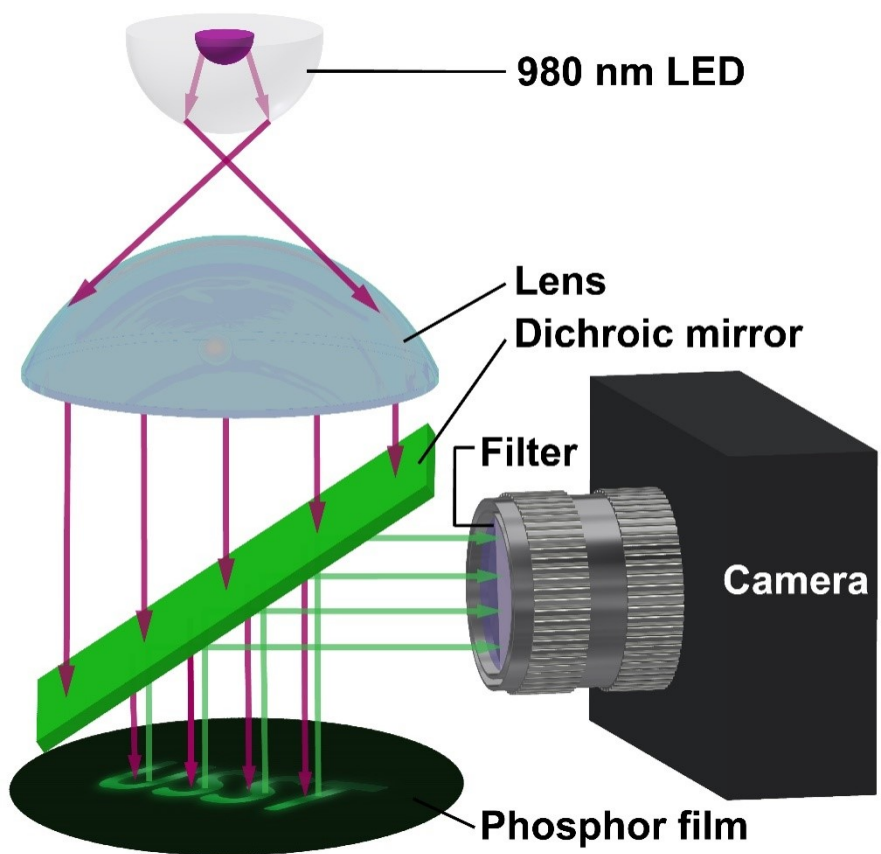

**Figure S4.** The experimental setup for reading out the information from the phosphor film under the 980 nm exposure.

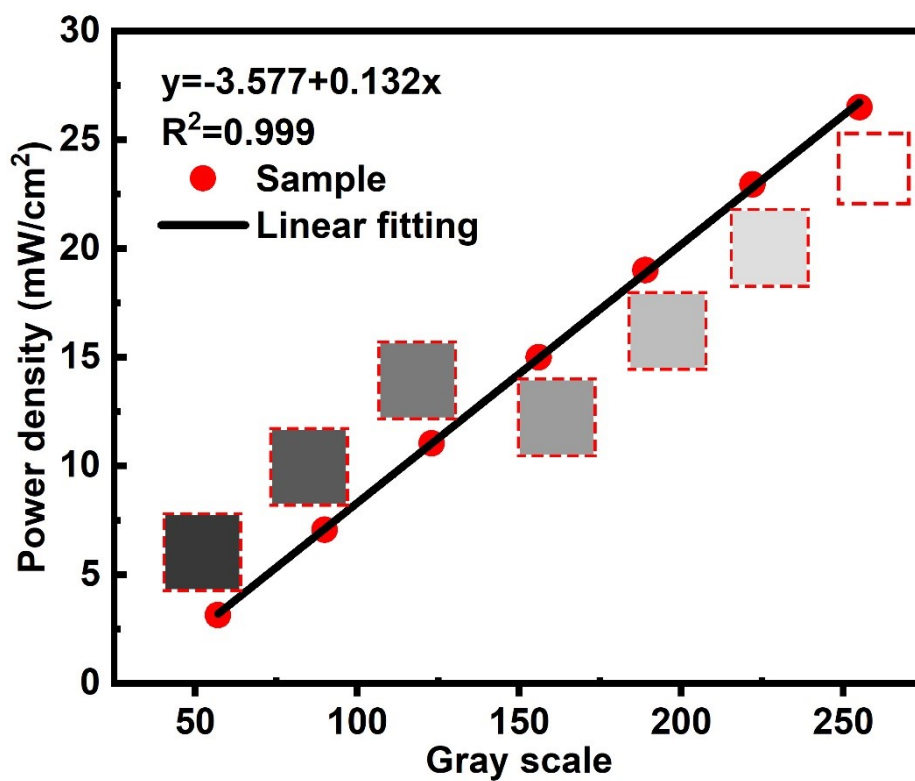

**Figure S5.** The power density measured behind the mask with the patterns of different gray scales.

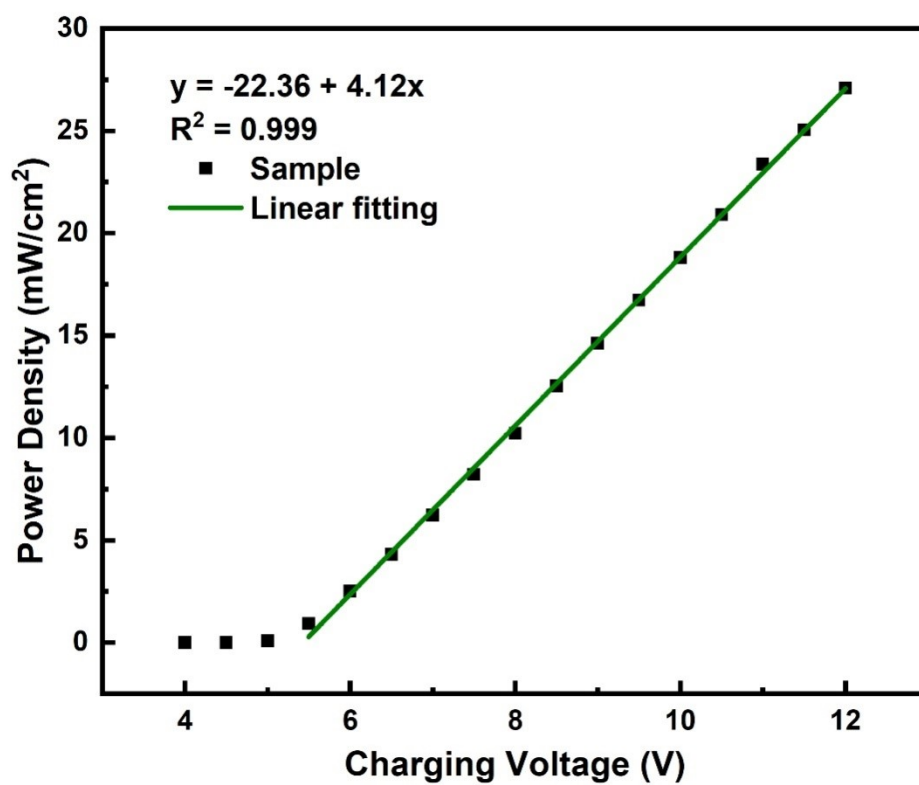

**Figure S6.** The relation between the output power density of the UV LED source and the driven voltage.

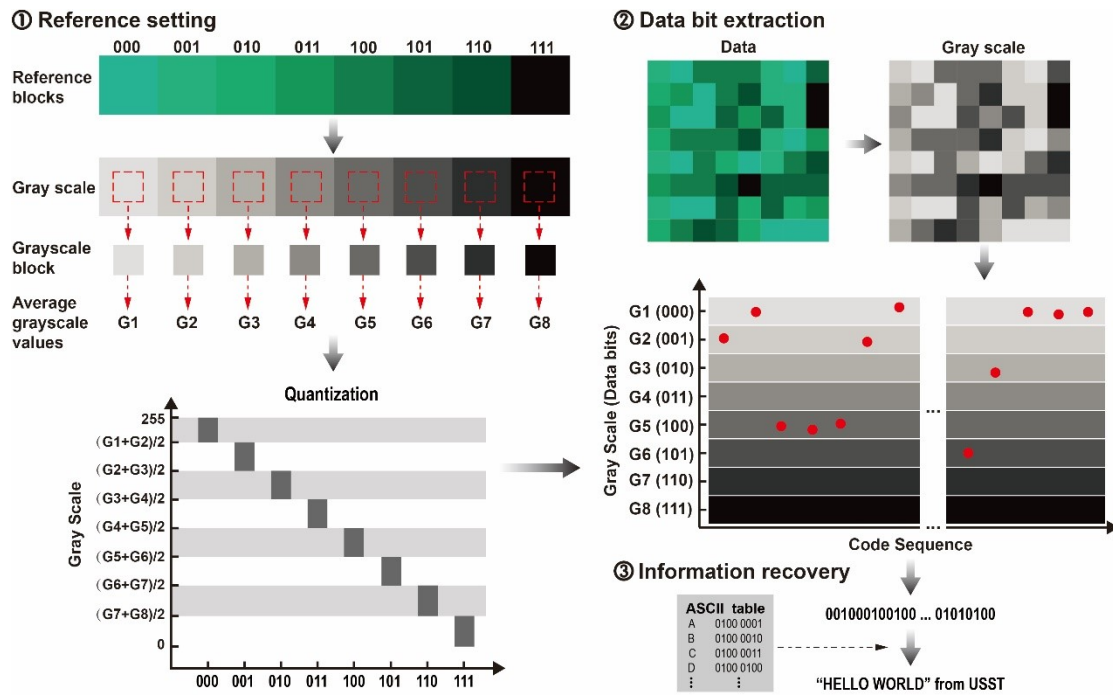

Figure S7. The data read-out procedure.
